# Supplementary material for: Optical Coherence Tomography Angiography in Type 1 Diabetes Mellitus. Report 1: Diabetic Retinopathy
Source: PubMed Central journal article supplement (PMC7533741; doi:10.1167/tvst.9.10.34), 2020-09-30
Supplement: tvst-9-10-34_s001.pdf [file tvst-9-10-34_s001.pdf]

**Supplemental Table 1. Demographic and baseline characteristics of study patients according to diabetic retinopathy stage**

| Variable                                         | Statistic    | Total<br>(n=507)  | Control<br>(n=102) | No DR<br>(n=269)  | Mild NPDR<br>(n=109) | Moderate NPDR<br>(n=17) | Severe NPDR<br>(n=3) | Proliferative DR<br>(n=7) | P-<br>value<br>for<br>trend <sup>a</sup> |
|--------------------------------------------------|--------------|-------------------|--------------------|-------------------|----------------------|-------------------------|----------------------|---------------------------|------------------------------------------|
| <i>General characteristics</i>                   |              |                   |                    |                   |                      |                         |                      |                           |                                          |
| Age (years)                                      | Mean (SD)    | 40 (12.4)         | 43 (14.1)          | 37.8 (12.2)       | 41.1 (10.6)          | 43.5 (10.1)             | 49.1 (13.8)          | 53.3 (7.2)                | 0.128                                    |
|                                                  | Median (IQR) | 38.7 (30.2; 49.6) | 41.1 (30.6; 55.3)  | 36.4 (27.3; 46.7) | 40.5 (33.6; 48.3)    | 43.6 (37.2; 48.7)       | 50.9 (34.6; 62)      | 53.1 (46; 61)             |                                          |
| Sex (female)                                     | n (%)        | 273 (53.8%)       | 62 (60.8%)         | 143 (53.2%)       | 56 (51.4%)           | 8 (47.1%)               | 1 (33.3%)            | 3 (42.9%)                 | 0.091                                    |
| Smoking habit                                    | n (%)        | 89 (17.8%)        | 8 (8.3%)           | 53 (19.8%)        | 25 (22.9%)           | 3 (17.6%)               | 0 (0%)               | 0 (0%)                    | <0.001                                   |
| Hypertension                                     | n (%)        | 50 (10%)          | 8 (8.4%)           | 23 (8.6%)         | 12 (11%)             | 4 (23.5%)               | 2 (66.7%)            | 1 (14.3%)                 | <0.001                                   |
| BMI (kg/m <sup>2</sup> )                         | Mean (SD)    | 24.6 (3.8)        | 23.8 (3.6)         | 24.4 (3.6)        | 25.2 (4)             | 25.8 (4.6)              | 27.9 (4.7)           | 27.5 (4)                  | <0.001                                   |
|                                                  | Median (IQR) | 24 (21.9; 27)     | 23.3 (21.3; 25.7)  | 23.9 (21.9; 26.7) | 24.5 (22.5; 27.3)    | 26.7 (22.5; 29.4)       | 25.8 (24.6; 33.3)    | 25.2 (24.2; 30.6)         |                                          |
| <i>Diabetes-related clinical characteristics</i> |              |                   |                    |                   |                      |                         |                      |                           |                                          |
| DM duration (years)                              | Mean (SD)    | 20 (10.8)         | 0 (0)              | 16.4 (9.7)        | 26 (8.4)             | 30 (7.9)                | 36 (5.2)             | 36.9 (16.2)               | <0.001                                   |
|                                                  | Median (IQR) | 19.5 (10.9; 27)   | 0 (0; 0)           | 16 (8.5; 22.1)    | 26.1 (20.7; 32.3)    | 28.5 (23.5; 34.9)       | 37.8 (30.1; 40)      | 43.2 (21; 48.7)           |                                          |
| <i>Macrovascular complications</i>               |              |                   |                    |                   |                      |                         |                      |                           |                                          |
| - Cerebrovascular disease                        | n (%)        | 4 (0.8%)          | 0 (0%)             | 1 (0.4%)          | 1 (0.9%)             | 2 (11.8%)               | 0 (0%)               | 0 (0%)                    | 0.015                                    |
| - Ischemic heart disease                         | n (%)        | 4 (0.8%)          | 1 (1%)             | 1 (0.4%)          | 0 (0%)               | 1 (5.9%)                | 1 (33.3%)            | 0 (0%)                    | 0.061                                    |
| - Peripheral vascular disease                    | n (%)        | 3 (0.6%)          | 1 (1%)             | 1 (0.4%)          | 0 (0%)               | 0 (0%)                  | 1 (33.3%)            | 0 (0%)                    | 0.332                                    |
| <i>Treatment</i>                                 |              |                   |                    |                   |                      |                         |                      |                           |                                          |
| Insulin requirements (IU/kg/day)                 | Mean (SD)    | 0.5 (0.3)         | 0 (0)              | 0.6 (0.2)         | 0.6 (0.2)            | 0.8 (0.3)               | 0.5 (0.2)            | 0.6 (0.1)                 | <0.001                                   |
|                                                  | Median (IQR) | 0.5 (0.3; 0.7)    | 0 (0; 0)           | 0.6 (0.4; 0.8)    | 0.6 (0.5; 0.8)       | 0.7 (0.6; 0.9)          | 0.5 (0.4; 0.7)       | 0.6 (0.5; 0.7)            |                                          |
| Antihypertensive treatment                       | n (%)        | 48 (9.6%)         | 8 (8.3%)           | 20 (7.4%)         | 12 (11%)             | 4 (23.5%)               | 2 (66.7%)            | 2 (28.6%)                 | 0.002                                    |
| Hypolipemiant treatment                          | n (%)        | 5 (1%)            | 0 (0%)             | 3 (1.1%)          | 1 (0.9%)             | 1 (5.9%)                | 0 (0%)               | 0 (0%)                    | 0.276                                    |
| Antiplatelet treatment                           | n (%)        | 15 (3%)           | 1 (1%)             | 4 (1.5%)          | 4 (3.7%)             | 4 (23.5%)               | 1 (33.3%)            | 1 (14.3%)                 | <0.001                                   |
| <i>Laboratory tests</i>                          |              |                   |                    |                   |                      |                         |                      |                           |                                          |
| HbA1c                                            | Mean (SD)    | 7.2 (1.2)         | 5.4 (0.3)          | 7.4 (1)           | 7.7 (1)              | 7.5 (0.7)               | 8.4 (0.7)            | 8 (1.1)                   | <0.001                                   |
|                                                  | Median (IQR) | 7.2 (6.4; 7.8)    | 5.4 (5.2; 5.6)     | 7.3 (6.7; 7.8)    | 7.5 (7; 8.2)         | 7.4 (6.9; 8.2)          | 8.6 (7.6; 8.9)       | 7.9 (7.1; 8.8)            |                                          |
| Total cholesterol (mg/dL)                        | Mean (SD)    | 179.5 (31.4)      | 194.1 (32)         | 176.1 (30.6)      | 176.7 (31.3)         | 190.2 (29.7)            | 157 (28.6)           | 187.9 (17.8)              | 0.109                                    |
|                                                  | Median (IQR) | 178 (158; 199)    | 194 (174; 215)     | 177 (156; 193)    | 171 (155; 197)       | 188 (172; 214)          | 148 (134; 189)       | 192 (171; 206)            |                                          |
| LDL-c (mg/dL)                                    | Mean (SD)    | 103.7 (26)        | 116 (30.8)         | 100.7 (24.9)      | 102.3 (23.4)         | 109.1 (23.1)            | 83.3 (23.1)          | 110.4 (22.7)              | 0.088                                    |
|                                                  | Median (IQR) | 101 (86; 120)     | 115 (94; 140)      | 99 (83; 117)      | 101 (88; 120)        | 112 (84; 131)           | 86 (59; 105)         | 98 (90; 132)              |                                          |

**Supplemental Table 1. Demographic and baseline characteristics of study patients according to diabetic retinopathy stage**

| Variable                           | Statistic    | Total<br>(n=507) | Control<br>(n=102) | No DR<br>(n=269) | Mild NPDR<br>(n=109) | Moderate NPDR<br>(n=17) | Severe NPDR<br>(n=3) | Proliferative DR<br>(n=7) | P-<br>value<br>for<br>trend <sup>a</sup> |
|------------------------------------|--------------|------------------|--------------------|------------------|----------------------|-------------------------|----------------------|---------------------------|------------------------------------------|
| HDL-c (mg/dL)                      | Mean (SD)    | 58.9 (17)        | 56.5 (13.8)        | 59.9 (16.8)      | 57.8 (18.5)          | 63.6 (24.4)             | 53.7 (7.6)           | 56.3 (8.1)                | 0.811                                    |
|                                    | Median (IQR) | 56 (47; 68)      | 56 (48; 67)        | 58 (48; 70)      | 54 (45; 68)          | 54 (47; 93)             | 57 (45; 59)          | 58 (50; 63)               |                                          |
| Triglycerides (md/dL)              | Mean (SD)    | 87 (52.7)        | 112.8 (56.2)       | 81.1 (54.9)      | 82.9 (42.8)          | 87.1 (29.9)             | 100.7 (20.3)         | 105.6 (40.4)              | 0.114                                    |
|                                    | Median (IQR) | 72 (55; 100)     | 104 (67; 141)      | 65 (51; 89)      | 72 (56; 98)          | 80 (63; 109)            | 91 (87; 124)         | 116 (76; 130)             |                                          |
| Hb (g/L)                           | Mean (SD)    | 141 (12.7)       | 136.6 (12.4)       | 141.5 (12.2)     | 142.8 (12.8)         | 142.8 (13.1)            | 138.7 (30)           | 136.6 (15.9)              | 0.096                                    |
|                                    | Median (IQR) | 140 (132; 150)   | 135 (129; 144)     | 140 (133; 151)   | 143 (133.5; 152)     | 142 (131; 151)          | 145 (106; 165)       | 134 (123; 151)            |                                          |
| Hematocrite                        | Mean (SD)    | 0.9 (7.3)        | 0.4 (0)            | 1.2 (9.8)        | 0.4 (0)              | 0.4 (0)                 | 0.4 (0.1)            | 0.4 (0)                   | 0.768                                    |
|                                    | Median (IQR) | 0.4 (0.4; 0.5)   | 0.4 (0.4; 0.4)     | 0.4 (0.4; 0.5)   | 0.4 (0.4; 0.5)       | 0.4 (0.4; 0.5)          | 0.4 (0.3; 0.5)       | 0.4 (0.4; 0.5)            |                                          |
| Platetets (10 <sup>9</sup> /L)     | Mean (SD)    | 251.2 (57.4)     | 250.9 (52.8)       | 248.1 (58.4)     | 252.3 (56.7)         | 267.1 (56.2)            | 303.3 (60.3)         | 286 (68.4)                | 0.054                                    |
|                                    | Median (IQR) | 248 (211; 289)   | 245 (207; 296)     | 247 (210; 286)   | 246.5 (208; 284.5)   | 262 (216; 306)          | 326 (235; 349)       | 277 (227; 325)            |                                          |
| Creatinine (mg/dL)                 | Mean (SD)    | 0.8 (0.2)        | 0.8 (0.2)          | 0.8 (0.2)        | 0.8 (0.2)            | 0.8 (0.2)               | 1.3 (0.7)            | 1 (0.2)                   | <0.001                                   |
|                                    | Median (IQR) | 0.8 (0.7; 0.9)   | 0.7 (0.6; 0.9)     | 0.8 (0.7; 0.9)   | 0.8 (0.7; 0.9)       | 0.8 (0.6; 0.9)          | 1.1 (0.8; 2)         | 1 (0.8; 1.2)              |                                          |
| Albumin-to-creatinine ratio (mg/g) | Mean (SD)    | 9.8 (24.7)       | 9.6 (14.7)         | 8 (19.3)         | 9.7 (22)             | 12.9 (28.9)             | 104.3 (173.8)        | 28.1 (37.7)               | 0.001                                    |
|                                    | Median (IQR) | 3 (2; 7)         | 4 (2; 10)          | 3 (2; 6)         | 3 (2; 9)             | 4.5 (2; 9)              | 7 (1; 305)           | 10 (8; 37)                |                                          |

OCTA: optical coherence tomography angiography; DR: diabetic retinopathy; NPDR: non proliferative diabetic retinopathy; HbA1c: glycated haemoglobin (A1c); BMI: body mass index; DM: diabetes mellitus; IU: insulin units LDL-c: low density lipoprotein-cholesterol; HDL-c: high density lipoprotein-cholesterol; Hb: haemoglobin; SD: standard deviation; IQR: interquartile range.

<sup>a</sup> Linear regression for continuous variables or Mantel-Hansel test for categorical variables.
