# Supplementary material for: Optical Coherence Tomography Angiography in Type 1 Diabetes Mellitus. Report 1: Diabetic Retinopathy
Source: PubMed Central journal article supplement (PMC7533741; doi:10.1167/tvst.9.10.34), 2020-09-30
Supplement: tvst-9-10-34_s002.pdf [file tvst-9-10-34_s002.pdf]

**Supplemental Table 2. Ocular characteristics of the study eyes according to diabetic retinopathy stage**

| Variable                       | Statistic       | Total<br>(n=1009) | Control<br>(n=203) | No DR<br>(n=539)     | Mild NPDR<br>(n=214) | Moderate<br>NPDR (n=34) | Severe NPDR<br>(n=5) | Proliferative DR<br>(n=14) | P-value for<br>trend <sup>a</sup> |        |
|--------------------------------|-----------------|-------------------|--------------------|----------------------|----------------------|-------------------------|----------------------|----------------------------|-----------------------------------|--------|
| Visual acuity<br>(LogMAR)      | n               | 1005              | 200                | 539                  | 214                  | 34                      | 4                    | 14                         | <0.001                            |        |
|                                | Mean (SD)       | 0.03 (0.05)       | 0.02 (0.04)        | 0.03 (0.05)          | 0.03 (0.05)          | 0.07 (0.1)              | 0.23 (0.25)          | 0.11 (0.08)                |                                   |        |
|                                | Median<br>(IQR) | 0.03 (0; 0.03)    | 0 (0; 0.03)        | 0.03 (0; 0.03)       | 0.03 (0; 0.05)       | 0.03 (0.03;<br>0.08)    | 0.13 (0.08; 0.38)    | 0.08 (0.03;<br>0.17)       |                                   |        |
| Intraocular Pressure<br>(mmHg) | n               | 1006              | 201                | 539                  | 214                  | 34                      | 4                    | 14                         | <0.001                            |        |
|                                | Mean (SD)       | 15.9 (3.1)        | 14.8 (2.5)         | 15.9 (3.1)           | 16.8 (3.5)           | 17.6 (3.1)              | 18.5 (4.1)           | 14.9 (2.6)                 |                                   |        |
|                                | Median<br>(IQR) | 16 (14; 18)       | 15 (13; 16)        | 16 (14; 18)          | 16 (15; 19)          | 18 (16; 20)             | 19 (15; 22)          | 14.5 (13; 17)              |                                   |        |
| Spherical equivalent           | n               | 994               | 194                | 534                  | 214                  | 34                      | 4                    | 14                         | 0.805                             |        |
|                                | Mean (SD)       | -2.8 (67.4)       | -0.4 (2.1)         | -4.8 (91.9)          | -0.7 (2.2)           | -0.4 (2)                | 0.6 (2)              | 2.2 (1.1)                  |                                   |        |
|                                | Median<br>(IQR) | -0.4 (-1.6; 0.4)  | -0.1 (-1.4; 0.8)   | -0.5 (-1.8; 0.3)     | -0.5 (-1.6; 0.4)     | -0.6 (-1.6; 0.6)        | 0.2 (-1.1; 2.2)      | 2.4 (1.1; 2.8)             |                                   |        |
| Axial Length (mm)              | n               | 998               | 198                | 535                  | 213                  | 34                      | 4                    | 14                         | 0.018                             |        |
|                                | Mean (SD)       | 23.7 (2.8)        | 23.8 (1.1)         | 23.8 (3.7)           | 23.4 (1.2)           | 22.9 (0.9)              | 22.7 (0.4)           | 22.9 (0.8)                 |                                   |        |
|                                | Median<br>(IQR) | 23.5 (22.8; 24.3) | 23.7 (23; 24.6)    | 23.5 (22.9;<br>24.4) | 23.3 (22.8; 24)      | 23.2 (22.4;<br>23.6)    | 22.8 (22.5; 23)      | 22.7 (22.1;<br>23.6)       |                                   |        |
| Ocular pathology*              | n (%)           | No                | 1006 (100%)        | 201 (100%)           | 539 (100%)           | 214 (100%)              | 34 (100%)            | 4 (100%)                   | 14 (100%)                         | -      |
| Focal/Grid laser*              | n (%)           | No                | 1006 (100%)        | 201 (100%)           | 539 (100%)           | 214 (100%)              | 34 (100%)            | 4 (100%)                   | 14 (100%)                         | -      |
| PRP laser                      | n (%)           | No                | 993 (98.7%)        | 201 (100%)           | 539 (100%)           | 214 (100%)              | 32 (94.1%)           | 4 (100%)                   | 3 (21.4%)                         | <0.001 |
|                                | Yes             |                   | 13 (1.3%)          | 0 (0%)               | 0 (0%)               | 0 (0%)                  | 2 (5.9%)             | 0 (0%)                     | 11 (78.6%)                        |        |
| Ocular surgeries*              | n (%)           | No                | 1006 (100%)        | 201 (100%)           | 539 (100%)           | 214 (100%)              | 34 (100%)            | 4 (100%)                   | 14 (100%)                         | -      |
| Ocular treatment*              | n (%)           | No                | 1006 (100%)        | 201 (100%)           | 539 (100%)           | 214 (100%)              | 34 (100%)            | 4 (100%)                   | 14 (100%)                         | -      |

DR: diabetic retinopathy; NPDR: non-proliferative diabetic retinopathy; PRP: panretinalphotocoagulation SD: standard deviation; IQR: interquartile range.

<sup>a</sup> Linear regression for continuous variables or Mantel-Hansel test for categorical variables. \*No cases with previous ocular pathology, previous macular laser (focal/grid), previous ocular surgery, or previously treated with intravitreal therapy of any kind were included in this study.
